# Supplementary material
Source: Springer Nature journal article supplement (https://www.springermedizin.de/resource/supplementary/12245_2013_181_MOESM1_ESM.pdf/9672942)

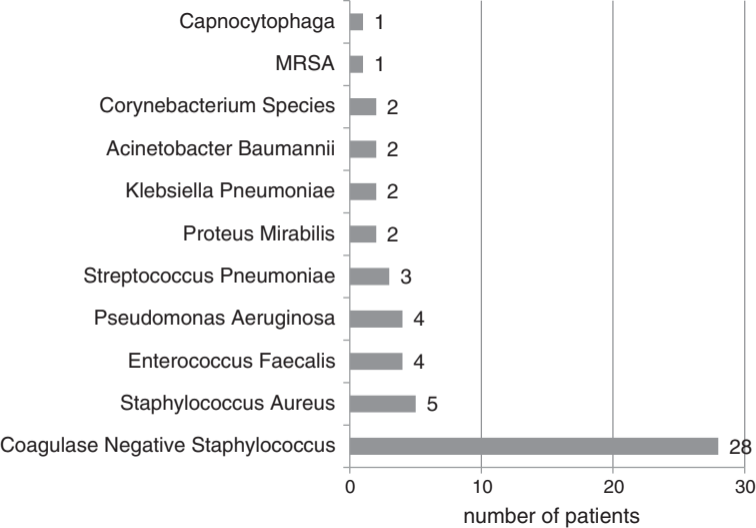

Supplement: MOESM1 [file 9672942]
